# Supplementary material for: Chronic Morphine Treatment and Antiretroviral Therapy Exacerbate HIV-Distal Sensory Peripheral Neuropathy and Induce Distinct Microbial Alterations in the HIV Tg26 Mouse Model
Source: MDPI journal article supplement (doi:10.3390/ijms25031569), 2024-01-26
Supplement: s1 [file s1]

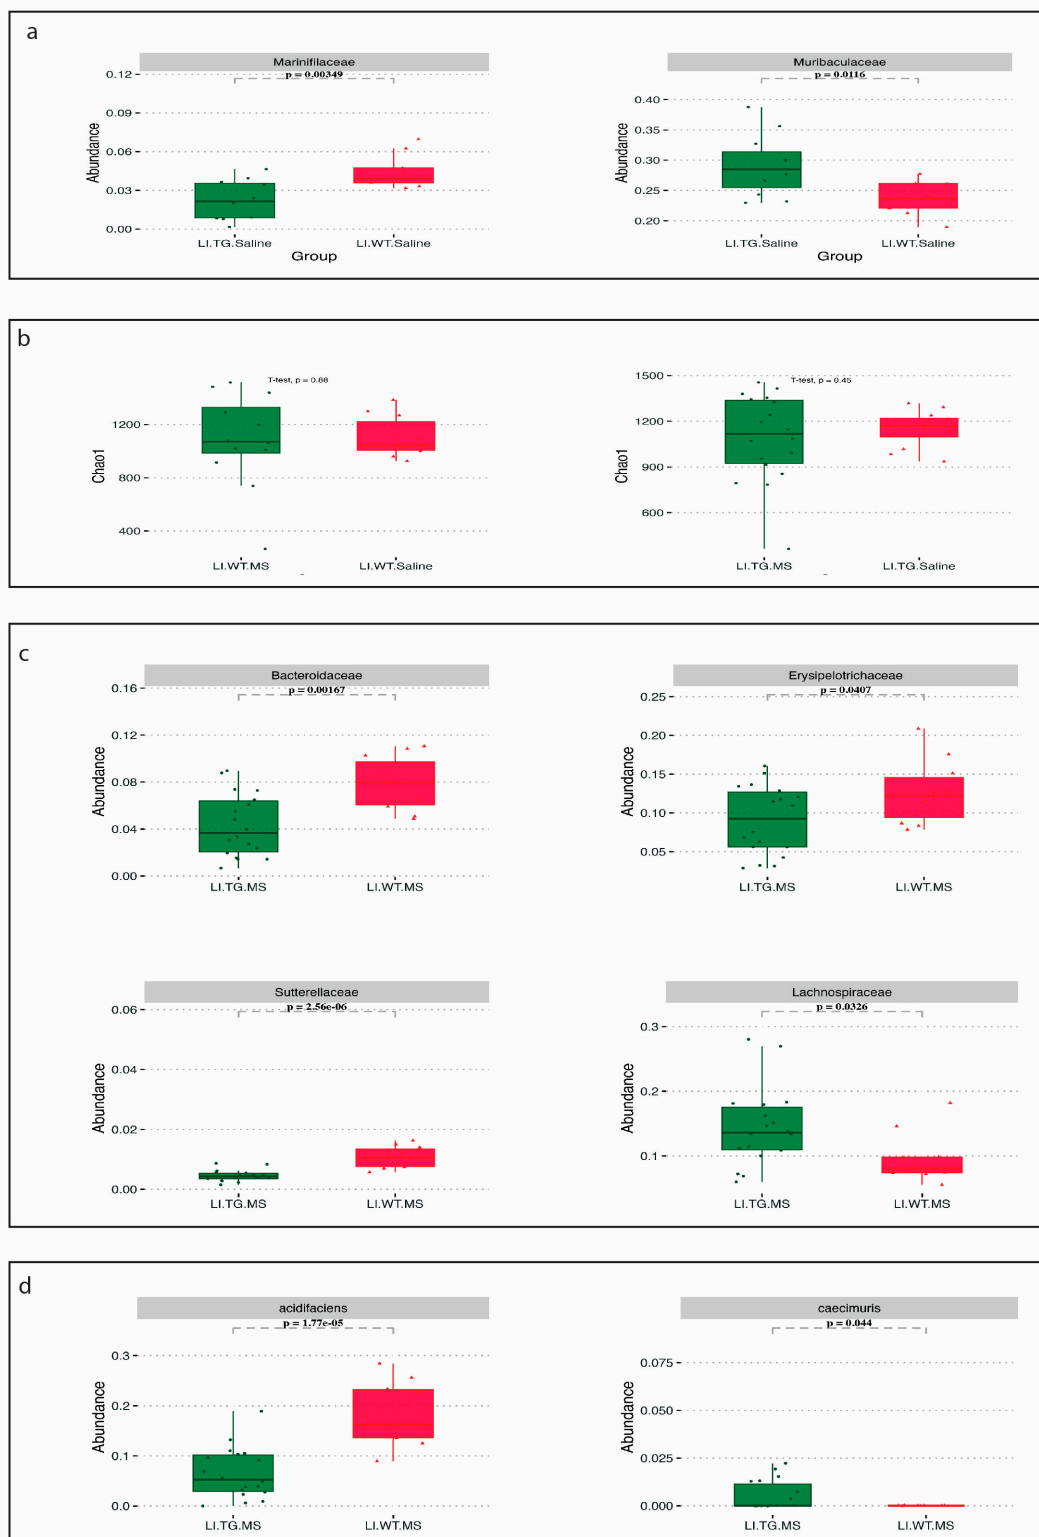

**Figure S1.** Distinct bacterial community are observed between WT and Tg26 mice before and after morphine treatment.

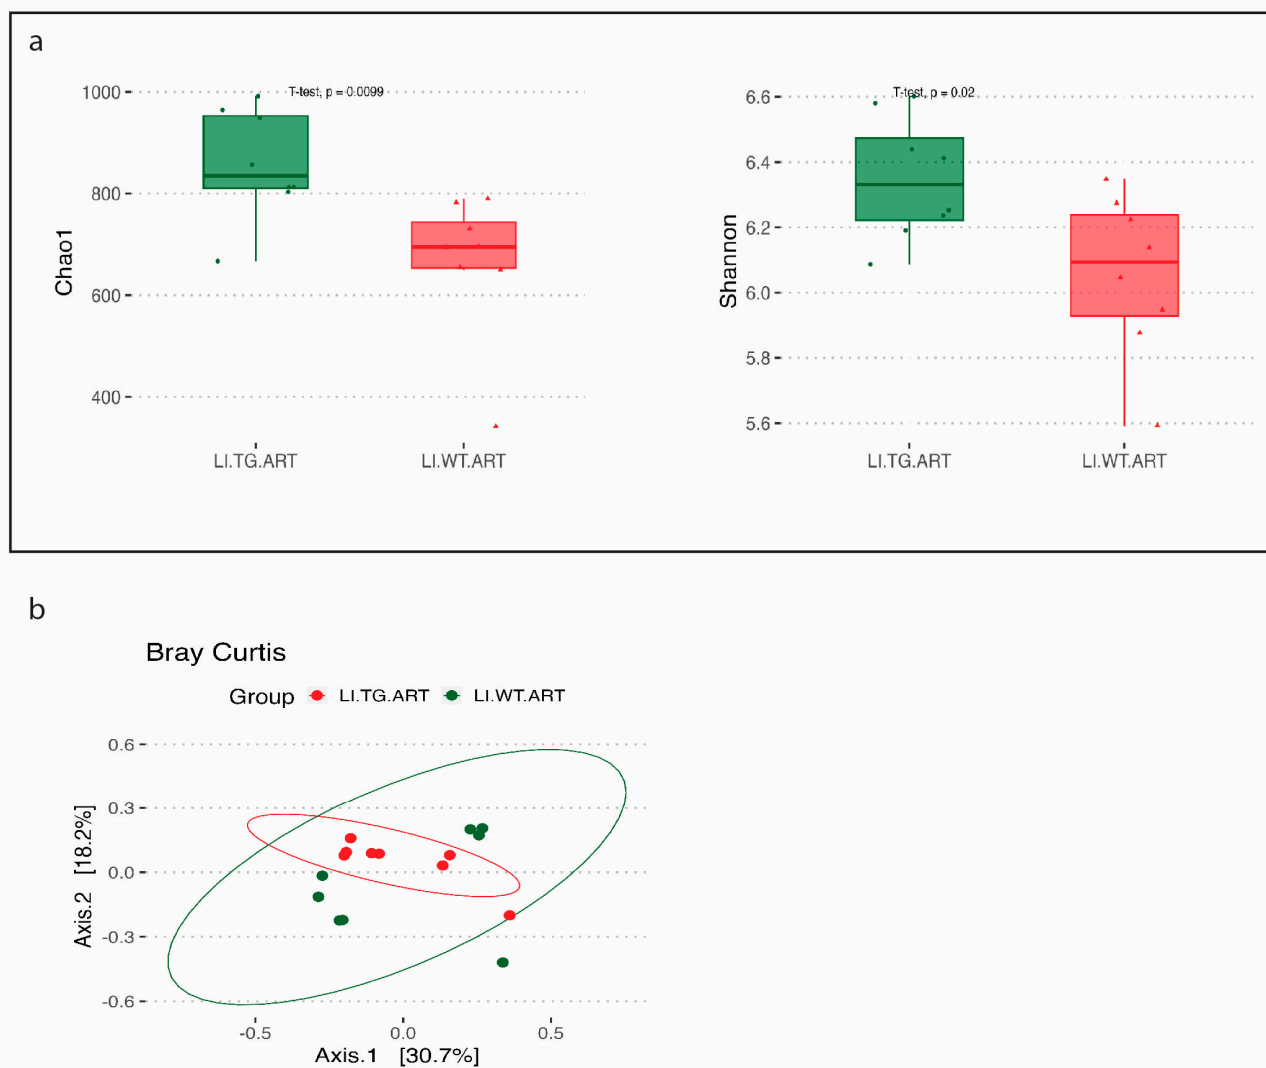

**Figure S2.** ART treatment modulates the gut microbiome in WT and Tg26 mice.
